# Supplementary material for: Comprehensive Analysis of the ILCs and Unconventional T Cells in Virus Infection: Profiling and Dynamics Associated with COVID-19 Disease for a Future Monitoring System and Therapeutic Opportunities
Source: MDPI journal article supplement (doi:10.3390/cells11030542), 2022-02-04
Supplement: s1 [file s1]

| Table S1: Phenotypic and function alterations of NKT cells in SARS-CoV-2 infection. |                                                 |                                                                                                         |                                                                                           |                                                |                          |                    |                                                         |                                            |
|-------------------------------------------------------------------------------------|-------------------------------------------------|---------------------------------------------------------------------------------------------------------|-------------------------------------------------------------------------------------------|------------------------------------------------|--------------------------|--------------------|---------------------------------------------------------|--------------------------------------------|
|                                                                                     | Type of sample                                  | Activated mediators                                                                                     | Produced Cytokines                                                                        | In situ recruitment                            | Chemokine receptors      | Expression Markers | Differential expression markers in subsets              |                                            |
| Jouan et al (Ref 39)                                                                | Serum, Blood, ETAs. Tool: Flow cytometry.       | ↑ level of IL-1 $\beta$ , IL-6, IL-1RA, IFN $\alpha$ 2, IFN $\gamma$ , IL17 in supernatants than serum. | Upon PMA/ Iono: ↑ % IL17 NKT cells than IFN $\gamma$ NKT in COVID-19 pts compared to HCs. | Airway NKT cells undetectable                  | In ETAs: ↑CXCL10, CXCL12 | PD-1; CD69         | Plasmatic IL18 Corr.+ with CD69 NKT in COVID-19 pts.    | ↑ PD1 NKT in COVID-19 pts compared to HCs. |
|                                                                                     |                                                 | ↑IL18 in COVID-19 pts.                                                                                  |                                                                                           |                                                |                          |                    | ↑CD69 in COVID-19 pts compared to HCs and Non-COVID-19. |                                            |
|                                                                                     |                                                 |                                                                                                         |                                                                                           |                                                |                          |                    | CD69 NKT Corr.+ with decreasing hypoxemia.              |                                            |
| Parrot et al (Ref 40)                                                               | Serum, Blood. Tool: Flow cytometry; Sc-RNA-seq. | ↑CXCL10, CX3CL1 in serum of COVID-19 pts compared to HDs.                                               | ND                                                                                        | ND                                             | ND                       | ND                 | ND                                                      | ND                                         |
| Odak et al (Ref 41)                                                                 | Blood analyzed by Flow cytometry                | ND                                                                                                      | ND                                                                                        | ND                                             | ND                       | ND                 | ND                                                      | ND                                         |
| Tomi et al (Ref 42)                                                                 | Blood, Serum; Tool: Flow cytometry              | In severe: ↑ IL-6, IL-8, MCP-1, IL-18, TGF $\beta$ , IL-10. ↓IL-12p70.                                  | ND                                                                                        | ND                                             | ND                       | ND                 | ND                                                      | ND                                         |
|                                                                                     |                                                 | In mild: ↓IL-10 , IL4. ↑TGF $\beta$ . ↓ IL-17A, IL-17F.                                                 |                                                                                           |                                                |                          |                    |                                                         |                                            |
| Vigon et al (Ref 45)                                                                | Blood, Serum; Tool: Flow                        | Plasma of Critical: ↑IL-8/ CXCL8, IL-6, TNF $\alpha$ ; IFN $\gamma$ ;                                   | ND                                                                                        | ↓%CD56+CD16+GZB+ in response to Hsp70 peptide. | ND                       | Degranulation and  | ↑% CD3+CD56+CD16+ in C.C.                               | ↑% CD3+CD56+CD16+ CD107a+ in C.C. in       |

|  |                     |                                                                            |  |                                                                                                |  |                    |  |                                              |
|--|---------------------|----------------------------------------------------------------------------|--|------------------------------------------------------------------------------------------------|--|--------------------|--|----------------------------------------------|
|  | Cytometry, Luminex. | Plasma Severe and Critical: ↑CD25/IL-2Ra; ↓ IL2, compared to mild disease. |  | ↓cytotoxic capacity against target cells without MHC class I molecules in comparison with M.C. |  | cytotoxic markers. |  | comparison with mild (data not significant). |
|--|---------------------|----------------------------------------------------------------------------|--|------------------------------------------------------------------------------------------------|--|--------------------|--|----------------------------------------------|

Surnatant of endotracheal aspirates: *ETAs*; Positively correlated: *Corr.+*; critical COVID-19: *C.C.*; mild COVID-19: *M.C.*; ↑ increases frequency or number compared to Controls; ↓ decreases frequency or number compared to Controls. Patients: *pts*.

| Table S2: Phenotypic and function alterations of $\gamma\delta$ T cells in SARS-CoV-2 infection. |                                                           |                                                                                |                                                                                                      |                                               |                                                                |                                                                                                                                                    |                                                                                                                                                                                      |                                                    |
|--------------------------------------------------------------------------------------------------|-----------------------------------------------------------|--------------------------------------------------------------------------------|------------------------------------------------------------------------------------------------------|-----------------------------------------------|----------------------------------------------------------------|----------------------------------------------------------------------------------------------------------------------------------------------------|--------------------------------------------------------------------------------------------------------------------------------------------------------------------------------------|----------------------------------------------------|
|                                                                                                  | Type of sample                                            | Activation marker in blood                                                     | Activation marker in situ                                                                            | Expression marker                             | Differential expression markers in subsets                     |                                                                                                                                                    |                                                                                                                                                                                      |                                                    |
| <b>Odak et al (Ref 41)</b>                                                                       | Blood; Tool: Flow cytometry                               | ND                                                                             | ↓% $\gamma\delta$ eff cells in blood                                                                 | CD45RA, CD62L                                 | ↑CD45RA+CD62+ ( $\gamma\delta$ naïve).                         | ↓CD45RA-CD62- ( $\gamma\delta$ eff).                                                                                                               | ↓CD45RA-CD62L+ memory- in Severe patients compared to HCs.                                                                                                                           | ↓CD45RA+CD62L- in Severe patients compared to HCs. |
| <b>Zhang et al (Ref 46)</b>                                                                      | Blood; Tool: Sc-RNA-seq                                   | ND                                                                             | ND                                                                                                   | Genes: GZMK<br>GZMA PRF1<br>TRAV1-2<br>TYROBP | ND                                                             |                                                                                                                                                    |                                                                                                                                                                                      |                                                    |
| <b>Jouan et al (Ref 39)</b>                                                                      | Serum, blood and surnatant of ETAs. Tool: Flow cytometry. | ↑%CD69+ $\gamma\delta$ T cells, % PD1+ $\gamma\delta$ T cells compared to HDs. | ↑%CD69+ $\gamma\delta$ T cells, PD-1+ $\gamma\delta$ T cells in ETA compared to blood of matched pts | ND                                            | V $\delta$ 2+: ↑ CD69+ compared to HDs. ↑ PD1 compared to HDs. | CD69+ V $\delta$ 1: from COVID-19 pts were not significantly changed compared with non-COVID-19 ill controls. ↑ PD1+ V $\delta$ 1 compared to HDs. | V $\gamma$ 1V $\delta$ 2-: from COVID-19 pts were not significantly changed compared with non-COVID-19 ill controls. PD1+ V $\gamma$ 1V $\delta$ 2-: did not change compared to HDs. |                                                    |

|                                  |                                         |                               |    |                       |    |
|----------------------------------|-----------------------------------------|-------------------------------|----|-----------------------|----|
| <b>Stephenson et al (Ref 44)</b> | Blood, Serum;<br>Tool: gene expression. | IL1B, IL1A and TNF $\alpha$ . | ND | ↓ CD28, CTLA4, CD40GL | ND |
|----------------------------------|-----------------------------------------|-------------------------------|----|-----------------------|----|

Effector-like  $\gamma\delta$  cells; ↑ increases frequency or number compared to Controls; ↓ decreases frequency or number compared to Controls.

| <b>Table S3: Phenotypic and function alterations of ILCs in SARS-CoV-2 infection.</b> |                                                       |                                                                                                                |                                                                  |                                                                                                                                      |                                                                                                                                                                |
|---------------------------------------------------------------------------------------|-------------------------------------------------------|----------------------------------------------------------------------------------------------------------------|------------------------------------------------------------------|--------------------------------------------------------------------------------------------------------------------------------------|----------------------------------------------------------------------------------------------------------------------------------------------------------------|
|                                                                                       | <b>Type of sample</b>                                 | <b>Activation marker in blood</b>                                                                              |                                                                  | <b>Differential expression markers in subsets</b>                                                                                    |                                                                                                                                                                |
| <b>Garcia et al (Ref 55)</b>                                                          | Blood analyzed by Flow cytometry                      | Levels of the cytokine IL- 10 positively correlated with the levels of CD69+ ILCs in the COVID-19 patients.    | ND                                                               | ↓ CXCR3. CCR4-/lo ILC1 clusters were overrepresented in severe COVID-19 patients.                                                    | ↓CD56+ ILC1 in COVID-19 patients.                                                                                                                              |
|                                                                                       |                                                       |                                                                                                                |                                                                  | ILC2 negatively correlated with CCL20 levels.                                                                                        | ↑CD69+ ↓ CD62L+                                                                                                                                                |
|                                                                                       |                                                       | Activated ILCp positively correlated with serum IL-6 levels in the COVID-19 patients.                          |                                                                  | ILCp positively correlated with CXCL10 levels in the COVID-19 patients. ↓CXCR3+ activated ILCp in both moderate and severe COVID-19. | ↑CD69+ ; (CD45RA+/hi/CD62L+/hi) were reduced in COVID-19 pts as compared with controls. IL18R1 and PD-L1 negatively correlated with the level of CD45RA+ ILCp. |
| <b>Segundo et al (Ref 58)</b>                                                         | Blood, serum; Tool: Flow cytometry.                   | IL6                                                                                                            | ND                                                               | ND                                                                                                                                   | ND                                                                                                                                                             |
| <b>Silverstein et al (Ref 56)</b>                                                     | Blood analyzed by Flow cytometry.                     | ND                                                                                                             | ND                                                               | ND                                                                                                                                   | ND                                                                                                                                                             |
|                                                                                       | RNA-seq profiles of ILC from available dataset online | ND                                                                                                             | ND                                                               | ND                                                                                                                                   | ND                                                                                                                                                             |
|                                                                                       | Blood analyzed by Flow cytometry.                     | Males had a lower median fraction of AREG+ ILCs than females. AREG expression in males was lower than females. | IL13 and amphiregulin (upon in vitro stimulation with Iono/PMA). | They hypothesis that ILC2 were recruited in lung tissue. They compared RNA-seq on blood ILCs from 9 HCs to previously                | ND                                                                                                                                                             |

|                                    |                                                       |                                                                                                                                                                                                                                        |    |                                                                            |                                                                                                                                                                                                                                                           |
|------------------------------------|-------------------------------------------------------|----------------------------------------------------------------------------------------------------------------------------------------------------------------------------------------------------------------------------------------|----|----------------------------------------------------------------------------|-----------------------------------------------------------------------------------------------------------------------------------------------------------------------------------------------------------------------------------------------------------|
|                                    |                                                       |                                                                                                                                                                                                                                        |    | published RNA-seq profiles of ILCs sorted from lung, spleen and Intestine. |                                                                                                                                                                                                                                                           |
|                                    | RNA-seq profiles of ILC from available dataset online | ND                                                                                                                                                                                                                                     | ND | ND                                                                         | ND                                                                                                                                                                                                                                                        |
| <b>Gomez-Cadena et al (Ref 57)</b> | Mouse model and Blood from patients; serum analysis.  | Elevated levels of the type 2 cytokines IL-5 , IL-13 and significant increase in IL-33 in COVID-19 patients compared to that in healthy donors; in particular serum IL-18 and IL6 levels were significantly higher in severe COVID-19. | ND | ND                                                                         | ILC2s in severe pts ↑ NKG2D+ population compared to those in mild pts and controls, CD25 and KLRG1 ↓. No differences in NKG2D, KLRG1, or CD25 expression were observed in ILC1s or ILCPs. PD-1, NKG2A, and NKp46, were similar on ILC2s from HDs and pts. |
|                                    | ND                                                    | ND                                                                                                                                                                                                                                     | ND | ND                                                                         | ILC2 NKG2D expression: Low 31.2%, High 68.18% of severe pts.                                                                                                                                                                                              |

↑ increases frequency or number compared to Controls; ↓ decreases frequency or number compared to Controls. Patients: *pts*.

| Table S4: Phenotypic and function alterations of MAIT cells in SARS-CoV-2 infection. |                                            |                                                                                                                                                                                                     |                     |                                                                                                                                                  |                                        |                     |                                            |    |
|--------------------------------------------------------------------------------------|--------------------------------------------|-----------------------------------------------------------------------------------------------------------------------------------------------------------------------------------------------------|---------------------|--------------------------------------------------------------------------------------------------------------------------------------------------|----------------------------------------|---------------------|--------------------------------------------|----|
|                                                                                      | Type of sample                             | Activated mediators                                                                                                                                                                                 | Produce d Cytokines | In situ recruitment                                                                                                                              | Chemokine receptors                    | Expressi on Markers | Differential expression markers in subsets |    |
| <b>Chen et al (Ref 47)</b>                                                           | Blood; Tool: sc-RNA seq and TCR sequencing | ↑ <i>IFNGR1</i> , <i>STAT1</i> , <i>TNFRSF1B</i> , <i>TNFAIP3</i> , and <i>TNFSF8</i> in Pcov (Severe, moderate and healthy) compared to Non-Pregnant (Severe, moderate and healthy) significantly. | ND                  | GO terms of “leukocyte cell–cell adhesion” was pronouncedly enriched in PCov groups than in the NCov groups compared to their corresponding HCs. | ↑CXCR4 in PCov groups compared to NHC. | ND                  | ND                                         | ND |

|                                    | Type of sample                      | Activated mediators                                                      | Produced Cytokines                                                                                                                                                                                                                                                                                                                                                                                                                                                                              | Expression Markers                                                                                                                                                                         |
|------------------------------------|-------------------------------------|--------------------------------------------------------------------------|-------------------------------------------------------------------------------------------------------------------------------------------------------------------------------------------------------------------------------------------------------------------------------------------------------------------------------------------------------------------------------------------------------------------------------------------------------------------------------------------------|--------------------------------------------------------------------------------------------------------------------------------------------------------------------------------------------|
| <b>Deschler et al (Ref 43)</b>     | Blood; Tool: Flow Cytometry         | ↓ IL-12R and IL-18R from COVID-19 patients compared to healthy controls. | Upon in vitro E.coli stimulation, significantly ↑ IFN $\gamma$ expression; MAIT cells failed to upregulate expression of IL-17A and TNF $\alpha$ . Upon in vitro stimulation with IL-12 and IL-18, ↓IL-17A and TNF $\alpha$ from COVID-19 pts compared to healthy controls; ↑ IFN $\gamma$ in response to IL-12/IL-18 ↓ in response to E. coli stimulation. Any differences in the expression of TNF $\alpha$ and IL-17A among mild and severe COVID-19 irrespective of the way of stimulation. | Expression of CD38, CD69 and HLA-DR, CTLA-4 and PD-1 in COVID-19 patients compared to healthy controls. Precisely, ↑CD38 and CD69 significantly in acute COVID-19 than Convalescent.<br>ND |
|                                    |                                     |                                                                          | ↓ granzyme B expression and perforin expression upon IL-12/IL-18 stimulation. MAIT from severe COVID-19 were able to significantly ↑ granzyme B expression upon IL-12/IL-18 stimulation and significantly higher levels from patients with mild COVID-19.                                                                                                                                                                                                                                       | ↑CTLA-4 and PD- 1 in severe COVID-19 but not significantly. ↓CTLA-4 in convalescent patients with severe COVID-19 and ↓↓ CTLA-4 in mild COVID-19.                                          |
|                                    |                                     |                                                                          | Ex vivo analysis: ↑ TNF $\alpha$ and IL-17A, GRZ B in Covid-19 compared to healthy controls while IFN $\gamma$ and perforin were unchanged. ↑Perforin in patients with severe COVID-19 compared to mild COVID-19 and healthy controls; IFN $\gamma$ , TNF $\alpha$ , IL-17A and GRZ B did not differ between MAIT cells isolated from patients with mild or severe COVID-19.                                                                                                                    |                                                                                                                                                                                            |
| <b>Hubrack et al (Ref 48)</b>      | Blood; Tool: Flow Cytometry.        | ND                                                                       | Upon in vitro long stimulation with IL12/IL18: ↓ GRZ B, TNF, IFN $\gamma$ , Perforin compared to controls.                                                                                                                                                                                                                                                                                                                                                                                      | ↑CD69 (% and MFI) in Severe patients compared to HC.                                                                                                                                       |
|                                    |                                     |                                                                          | Upon in vitro stimulation with IL7: ↓ GRZ B, IFN $\gamma$ , Perforine but not significantly. ↓ TNF $\alpha$ significantly.                                                                                                                                                                                                                                                                                                                                                                      | Slight decrease level of CD69 (% and MFI) in mild patients compared to severe. Data did not significant.                                                                                   |
|                                    |                                     |                                                                          | Upon in vitro IL12/IL18 or IL7: ↑ MFI of Perforin compared to Unstimulated condition.                                                                                                                                                                                                                                                                                                                                                                                                           |                                                                                                                                                                                            |
| <b>Notarbartolo et al (Ref 49)</b> | Blood. Tool: Sc-RNAseq and TCR-seq; | ↑CD69, FOS, DUSP1                                                        | ↑ IFN- responsive genes in patients with severe disease.                                                                                                                                                                                                                                                                                                                                                                                                                                        | <i>KLRB1 (CD161), SLC4A10, RORC, and CCR6</i><br><i>TCR gene usage (TRAV1-2, TRAJ33/12/20, and TRBV20/6)</i><br><i>CCL5, NKG7, PRF1, CST7, and GZMK</i>                                    |

|                           |                                                                 |                                                                                                                                                                                                                         |                                                                                                                                                                                                                                                                                      |                                                                                                                                                                                                                                                                                                                     |
|---------------------------|-----------------------------------------------------------------|-------------------------------------------------------------------------------------------------------------------------------------------------------------------------------------------------------------------------|--------------------------------------------------------------------------------------------------------------------------------------------------------------------------------------------------------------------------------------------------------------------------------------|---------------------------------------------------------------------------------------------------------------------------------------------------------------------------------------------------------------------------------------------------------------------------------------------------------------------|
|                           | Flow cytometry.                                                 |                                                                                                                                                                                                                         |                                                                                                                                                                                                                                                                                      |                                                                                                                                                                                                                                                                                                                     |
|                           | Type of sample                                                  | Chemokines                                                                                                                                                                                                              | Expression markers                                                                                                                                                                                                                                                                   | Differential expression markers in subsets                                                                                                                                                                                                                                                                          |
| Shi et al<br>(Ref 50)     | scRNA-seq raw data from GSA                                     | ↑ genes associated with chemotaxis and apoptosis in severe cases.                                                                                                                                                       | ↑ <i>TRBV9</i> , <i>TRAV8-2</i> , <i>S100A8</i> , <i>GZMH</i> , <i>S100A9</i> , <i>KLF6</i> , <i>CD8B</i> , <i>KLRD1</i> , <i>IGLV3-19</i> , and <i>JCHAIN</i>                                                                                                                       | <div>↑% TRAV1-2 or TRBV33 cells. ↓ TRAV1-2 or TRBV33 compared with moderate and convalescent cases.</div> <div>↓TRAV1-2 in severe cases compared with other conditions.</div> <div>↓The usage level of gene pair TRAV1-2 and TRAJ12 in severe cases.</div>                                                          |
|                           |                                                                 |                                                                                                                                                                                                                         | ↓ <i>SLC4A10</i> and <i>TRAV1-2</i>                                                                                                                                                                                                                                                  |                                                                                                                                                                                                                                                                                                                     |
|                           |                                                                 |                                                                                                                                                                                                                         | The number of high frequencies of clonotypes of MAIT cells was relatively high. There were more large clonal expansions (clonal size >10) in the severe cases than in the other conditions. ↓The expression levels of genes associated with cell activation in MAIT of severe cases. |                                                                                                                                                                                                                                                                                                                     |
|                           | Type of sample                                                  | Cytokine production by Flow Cytometry analysis                                                                                                                                                                          |                                                                                                                                                                                                                                                                                      | Cytokine production by Sc-gene expression                                                                                                                                                                                                                                                                           |
| Flament et al<br>(Ref 53) | Blood analysed by flow cytometry. Serum to quantify proteins.   | In the blood of surviving patients with COVID-19 hospitalized in an IDU: ↓IL-6, IL-8, IL-10, ↑IFNα2, ↓IL15, IL18, IL1β compared to ICU o fatal Covid-19.                                                                |                                                                                                                                                                                                                                                                                      | Upon Iono/ (PMA) ionomycin in vitro stimulation and withou stimulation:↑ IFNγ, IL2 and GZB and IL17 of circulating MAIT in severe patients.                                                                                                                                                                         |
|                           |                                                                 | In the blood of surviving patients with COVID-19 hospitalized in an ICU: ↓IL-6, IL-8, IL-10, IFNα2, ↓IL15, IL18, IL1β compared to fatal Covid-19.                                                                       |                                                                                                                                                                                                                                                                                      | ↑IFNγ and TNFα and GzB in deceased patients compared to surviving patients.                                                                                                                                                                                                                                         |
|                           | Blood analysed by Facs Sorting and RT-qPCR. Sc-gene expression. | In the blood of surviving patients with COVID-19 hospitalized in fatal COVID-19: ↑IL-6, IL-8, IL-10, IFNα2, IL15, IL18, IL1beta compared to ICU and IDU except for IFNγ. Note: differences in IL1b are not significant. |                                                                                                                                                                                                                                                                                      | Gene expression in ICU: ↓ <i>IFNA</i> ↑ <i>IL18</i> in opposite compared to IDU. Gene expression in ICU: ↓ <i>STATA1</i> , <i>IRF1</i> , <i>IRF9</i> compared to IDU. Gene Expression in ICU: ↑ <i>NLRP3</i> , <i>TXNIP</i> compared to IDU. Gene Expression in ICU: ↑ <i>PRDM1</i> , <i>HOBIT</i> , <i>TBX21</i> . |
| Yang et al<br>(Ref 52)    | Blood analyzed by Mass cytometry and Flow Cytometry.            | Upon E. coli stimulation or IL12/IL18: severe COVID-19 ↓IFNγ, GzmB, and CD107a than those from HC; Upon coculture with CD14+ cells from patients with severe COVID-19 ↓IFNγ and GzmB production.                        |                                                                                                                                                                                                                                                                                      | <div>TEM (CD45RA + CD197-).</div> <div>naive (CD45RA + CD1971+)</div> <div>central memory T (CD45RA</div> <div>TEM (CD45RA- CD197 +) like cells.</div>                                                                                                                                                              |

|                              |                                                     |                                                                                                                                                                                                                                                                         |                                                                                                                                           |                                                                                                                                                                                                                                          |                                                                        |                                                                                                           |
|------------------------------|-----------------------------------------------------|-------------------------------------------------------------------------------------------------------------------------------------------------------------------------------------------------------------------------------------------------------------------------|-------------------------------------------------------------------------------------------------------------------------------------------|------------------------------------------------------------------------------------------------------------------------------------------------------------------------------------------------------------------------------------------|------------------------------------------------------------------------|-----------------------------------------------------------------------------------------------------------|
|                              |                                                     | <p>Upon E.coli stimulation or IL12/IL18: mild COVID-19 ↓ GzmB and CD107a than those from HC.</p> <p>In asymptomatic carriers with COVID-19 function of MAIT remain unchanged. Upon E.coli stimulation or IL12/IL18: convalescent patients restored their functions.</p> |                                                                                                                                           | <p>. Significantly decreased in patients with severe COVID-19</p>                                                                                                                                                                        | <p>- CD1971-). Increase in both Mild and Severe COVID-19 patients.</p> | <p>Significantly increased in patients with mild and severe COVID-19.</p>                                 |
|                              | <b>Type of sample</b>                               | <b>In situ recruitment</b>                                                                                                                                                                                                                                              | <b>Expression markers</b>                                                                                                                 | <b>Differential expression markers in subsets</b>                                                                                                                                                                                        |                                                                        |                                                                                                           |
| <b>Yu et al (Ref 51)</b>     | Blood, BALF, NPS. Tool: Flow cytometry; sc-RNA seq. | ↑MAIT in airway tissue of Covid-19 Females more than males.                                                                                                                                                                                                             | IL-4, IL-13, IL-10, TGF-β, NGF- TRKA signaling axis, RAF-independent mitogen-activated protein kinase (MAPK), estrogen-dependent pathway. | MAIT alpha in healthy individuals but after SARS-CoV2 infection females pts lost this phenotype.                                                                                                                                         |                                                                        | MAIT beta in exposed and infected groups; females in late disease increased percentage of phenotype beta. |
|                              |                                                     | airway tissue of Covid-19 Females: <i>IL7R, CISH, SOCS1</i> . ↑ <i>BCL2, FOXP1, CDKN1B, BTG2, KLF2, MYC, and CEBPD</i> . ↓ <i>BAX</i> and <i>CASP3</i>                                                                                                                  | ↑CD69 in hospitalized group without any correlation with sex or phenotype.                                                                |                                                                                                                                                                                                                                          |                                                                        |                                                                                                           |
|                              |                                                     | airway tissue of COVID-19 Males: ↑CCL2.                                                                                                                                                                                                                                 |                                                                                                                                           |                                                                                                                                                                                                                                          |                                                                        |                                                                                                           |
| <b>Parrot et al (Ref 40)</b> | Serum, blood. Tool: Flow cytometry and Sc-RNA-seq.  | The transcriptional profile indicated that MAIT cells were the main subset of airway T cells expressing IL17A. This profile was paired with expression of TNF and an apparent lack of IFNG and GZMB transcripts.                                                        | Inverse correlation between CCL28, CXCL11, CCL20, IL17C and absolute number of MAIT.                                                      | ↑CD69 in AS patients together with GrzB and Ki67 than AM patients. PD-1, IL-7R, CXCR6, granzyme A (GrzA), and CD56 were similar between HD, AM, and AS groups. ↑ CD69 on MAIT cells of died patients (analyzed 4 patients) than patients |                                                                        |                                                                                                           |

|                             |                                                           |                                                                                                                                          |                                                                                             |                                                                                                                                   |    |
|-----------------------------|-----------------------------------------------------------|------------------------------------------------------------------------------------------------------------------------------------------|---------------------------------------------------------------------------------------------|-----------------------------------------------------------------------------------------------------------------------------------|----|
|                             |                                                           |                                                                                                                                          |                                                                                             | who survived. In convalescent patients CD69 repristinated its normal values.                                                      |    |
|                             | ND                                                        | ↓CXCR3 in both AM and AS COVID-19 patients. In convalescent patients, CXCR3 levels were still suppressed.                                | ND                                                                                          | ND                                                                                                                                | ND |
| <b>Zhang et al (Ref 46)</b> | Blood; Tool: Sc-RNA-seq                                   | ND                                                                                                                                       | ND                                                                                          | GO analysis demonstrated that MAIT from moderate and severe patients responded more to IFN than the acute inflammation.           |    |
|                             | <b>Type of sample</b>                                     | <b>Cytokine expression in situ</b>                                                                                                       | <b>Cytokine expression in blood</b>                                                         | <b>Differential expression markers</b>                                                                                            |    |
| <b>Jouan et al (Ref 39)</b> | Serum, blood and surnatant of ETAs. Tool: Flow cytometry. | ↑% MAIT in the airways.↑ IL-1β, IL-6, IL-1RA, IFN-α2, IFNγ and IL17 in supernatants of ETAs. The plasma level of IL18 ↑ in Covid-19 pts. | Circulating MAIT produced less IFNγ compared to HCs and increase capacity to produce IL17A. | CD69+ MAIT positively correlated with the level of plasmatic IL18. ↑CD69, PD1 MAIT in ETA compared to blood of the same patients. |    |

Non-Pregnant healthy controls: *NHC*; Genome Sequence Archive: *GSA*; Bronchoalveolar lavage fluid: *BALF*; nasopharyngeal swabs: *NPSs*;
